# Supplementary material for: Genetic and clinical characterization of B7‐H3 (CD276) expression and epigenetic regulation in diffuse brain glioma
Source: PubMed Central journal article supplement — Cancer Sci. 2018 Aug 29;109(9):2697–705. doi: 10.1111/cas.13744 (PMC6125452; doi:10.1111/cas.13744), 2018-08-29
Supplement: CAS-109-2697-s001.pdf [file CAS-109-2697-s001.pdf]

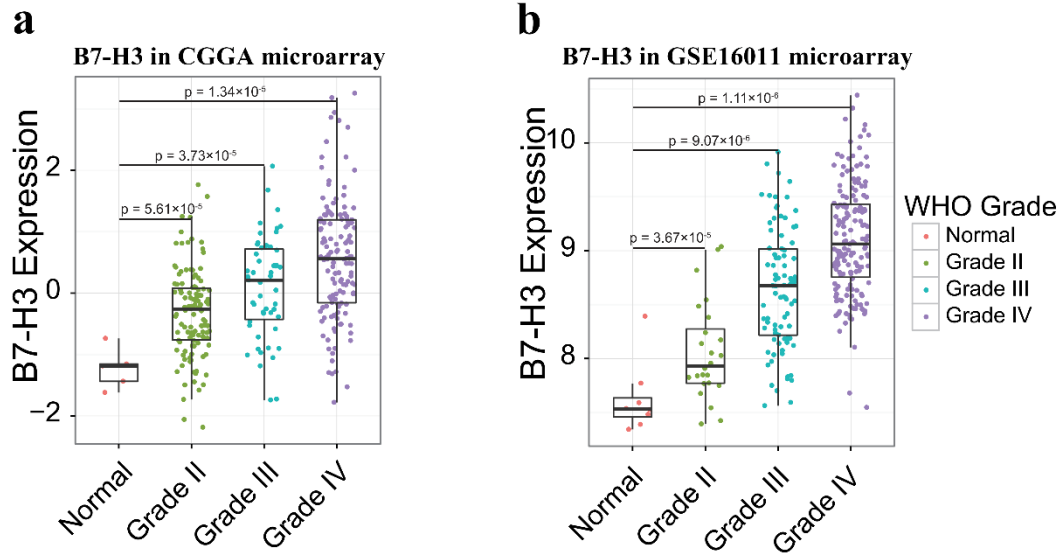

Fig S1. Comparison of B7-H3 expression between tumor-naïve brain tissue and glioma in CGGA microarray dataset (a) and GSE16011 microarray dataset (b).

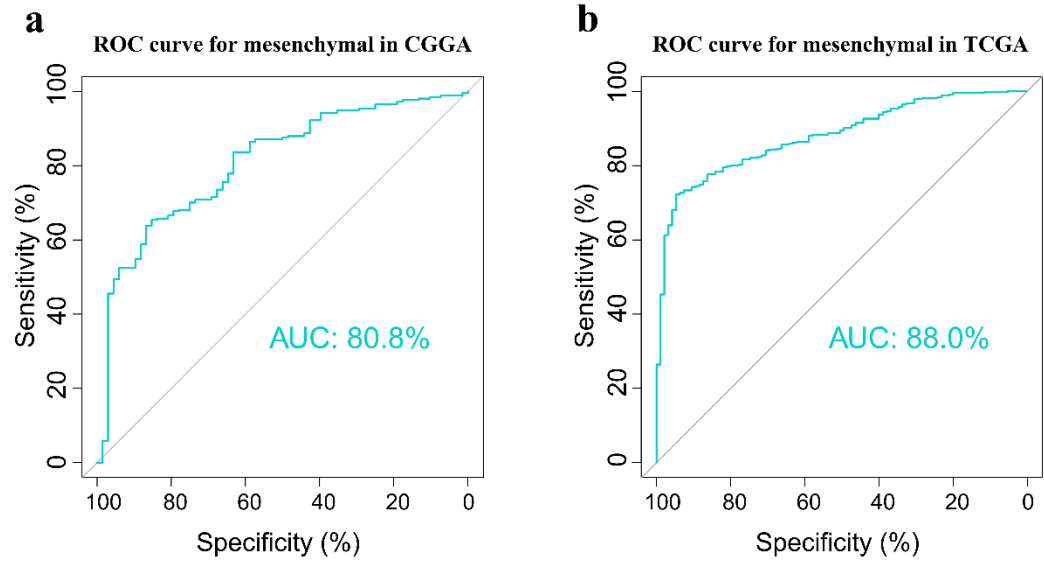

Fig S2. ROC curves for predicting mesenchymal subtype in CGGA (a) and TCGA (b) dataset.

## B7-H3 Expression in CGGA microarray dataset

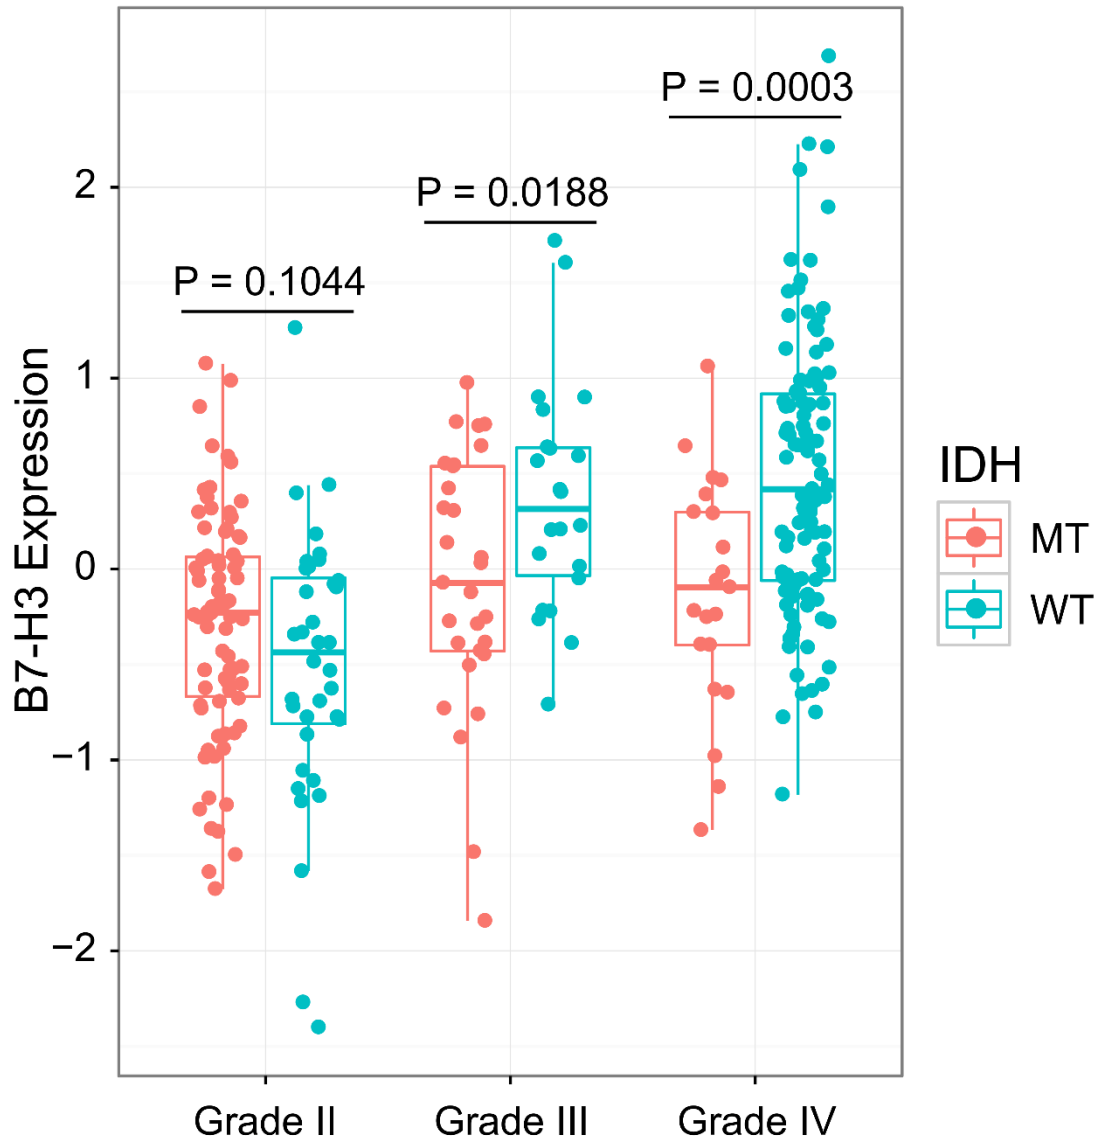

Fig S3. Relationship between B7-H3 expression and IDH mutation in CGGA Agilent microarray dataset. Red dots and cyan dots indicate IDH mutant and wild-type samples, respectively. Student's t-test was used to check the statistical difference between binary samples.

**a** Enrichment Map of GSEA on “GO\_BP” in CGGA GBM

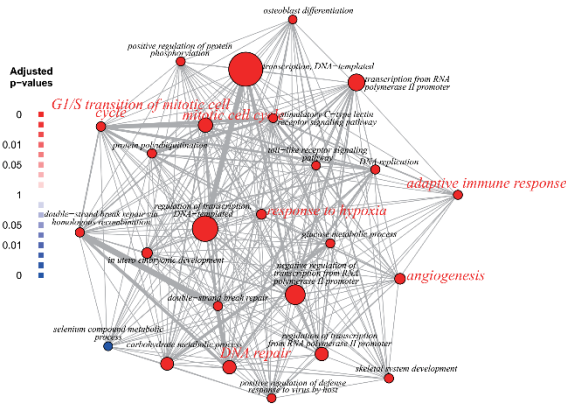

**b** Enrichment Map of GSEA on “PW\_KEGG” in CGGA GBM

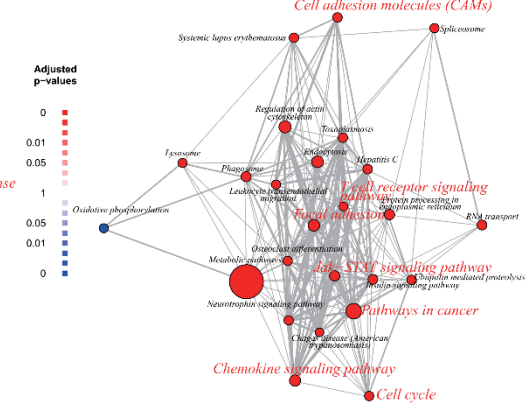

**c** Enrichment Map of GSEA on “GO\_BP” in TCGA GBM

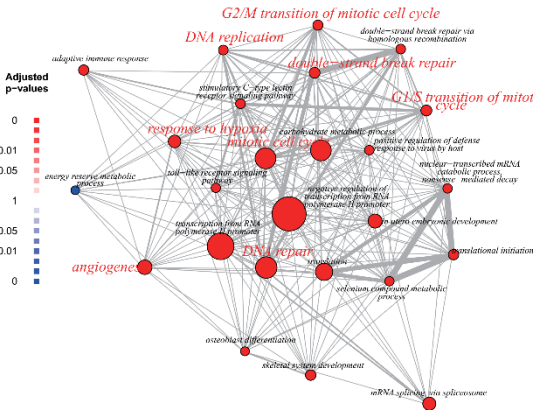

**d** Enrichment Map of GSEA on “PW\_KEGG” in TCGA GBM

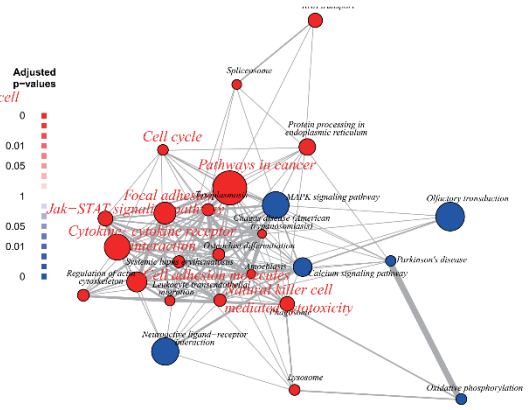

Fig S4. B7-H3 related biological processes (a, c) and pathways (b, d) in GBM. In the enrichment map for GSEA, nodes are colored by the sign of the enrichment scores (red: +, blue: -). The sizes of nodes are in proportion to the sizes of gene sets, while the width of edges is proportionate to Jaccard coefficients.

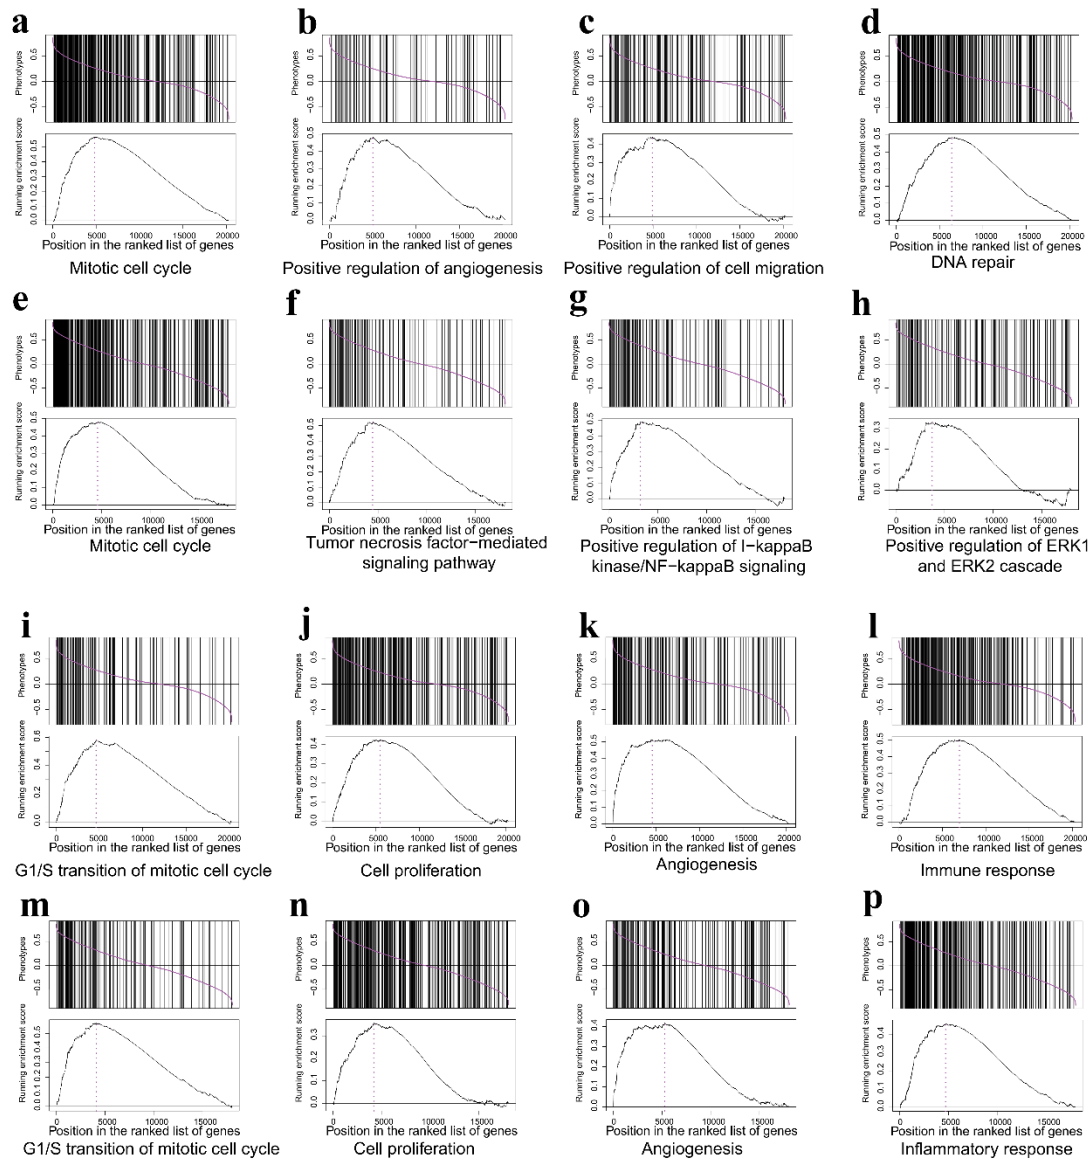

Fig S5. Concerted B7-H3 related biological processes and pathways in whole grade glioma of CGGA (a-d) and TCGA dataset (e-h).

Top 25 B7-H3 most related biological processes and pathways in GBM of CGGA (i-l) and TCGA dataset (m-p).
